# Supplementary material for: Quantification of anti-parasite and anti-disease immunity to malaria as a function of age and exposure
Source: eLife journal article supplement (doi:10.7554/elife.35832), 2018-07-25
Supplement: supp [file elife_poa_e35832_Supplementary_file_2.docx]

# Appendix 2

# Models adjusted for recent exposure

To assess whether recent exposure to malaria was associated with different levels of anti-parasite and anti-disease immunity we fit models adjusted for number of P.*falciparum* positive visits in different windows of time (three months and six months). We fit models where the association was assumed to be linear, as well as models that allowed for a smooth relationship (for six months only). Data from the visits that occurred in the first 3 and 6 months since enrollment were excluded from these analyses, respectively. See Figure 5-figure supplement 3.

**Appendix 2-Table 1. Anti-parasite immunity**

| **Time window** | **Functional form** | **Coefficient (95%CI)** | **p-value** |
| --- | --- | --- | --- |
| 3 months | Linear | -0.003 (-0.03-0.03) | 0.83 |
| 6 months | Linear | 0.003 (-0.02-0.02) | 0.75 |
| 6 months | Smooth | - | 0.77 |
|  |  |  |  |

**Appendix 2-Table 2. Anti-disease immunity**

| **Time window** | **Functional form** | **Coefficient (95%CI)** | **p-value** |
| --- | --- | --- | --- |
| 3 months | Linear | -0.01 (-0.04-0.02) | 0.38 |
| 6 months | Linear | -0.01 (-0.03-0.01) | 0.15 |
| 6 months | Smooth | - | 0.15 |
