# Supplementary figures and images for: Quantification of anti-parasite and anti-disease immunity to malaria as a function of age and exposure
Source: eLife journal article supplement (doi:10.7554/elife.35832), 2018-07-25

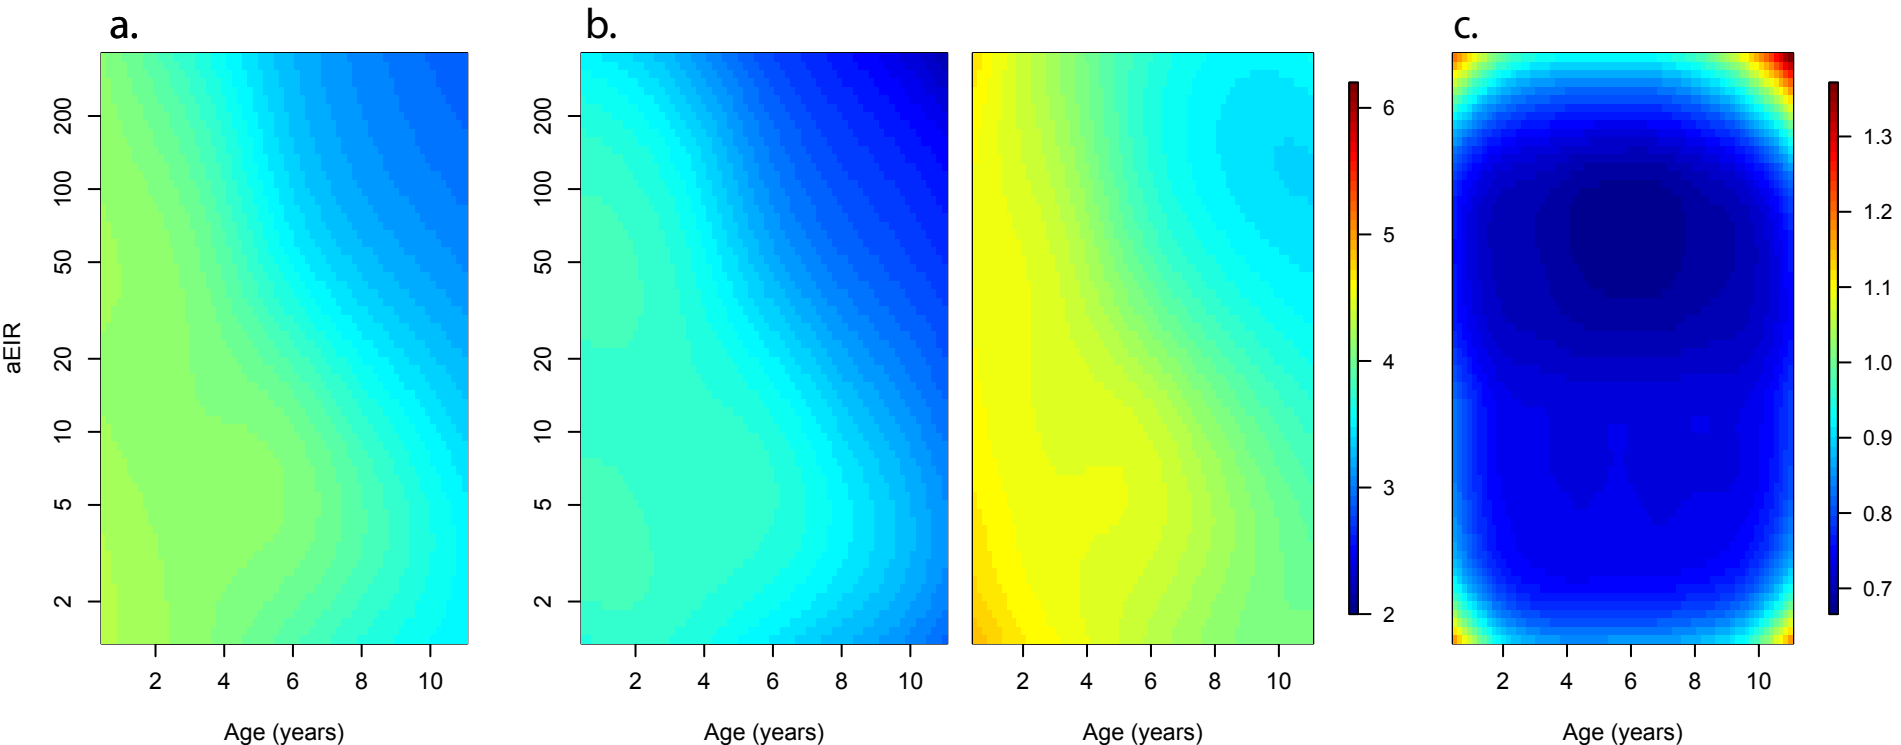

Supplement: supp [file elife_poa_e35832_Figure_5_figure_supplement_1.pdf › elife_poa_e35832_Figure_5_figure_supplement_1.pdf]

aEIR

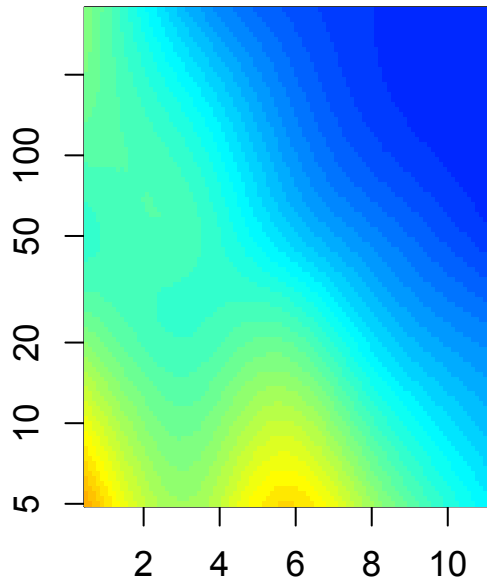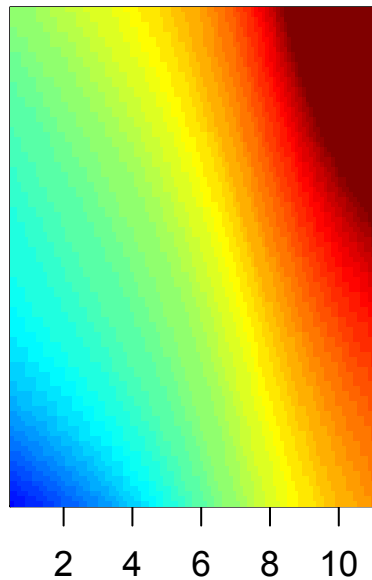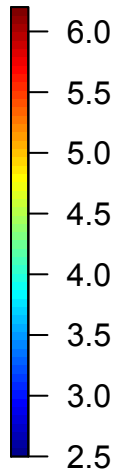

Supplement: supp [file elife_poa_e35832_Figure_5_figure_supplement_10.pdf › elife_poa_e35832_Figure_5_figure_supplement_10.pdf]

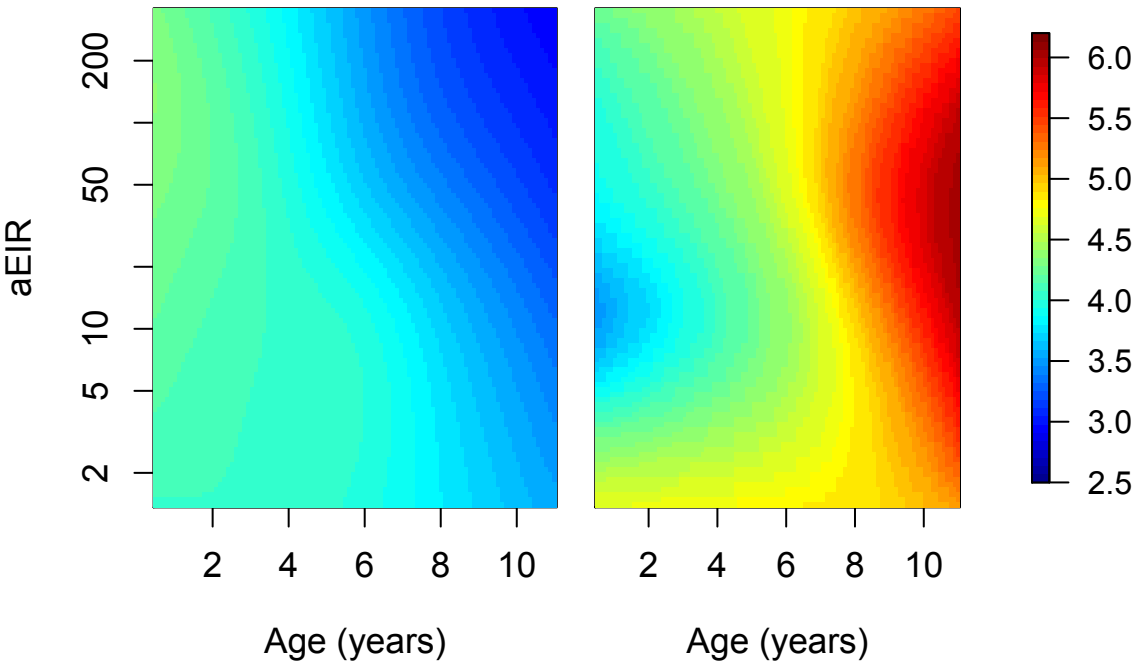

Supplement: supp [file elife_poa_e35832_Figure_5_figure_supplement_11.pdf › elife_poa_e35832_Figure_5_figure_supplement_11.pdf]

Parasite Density

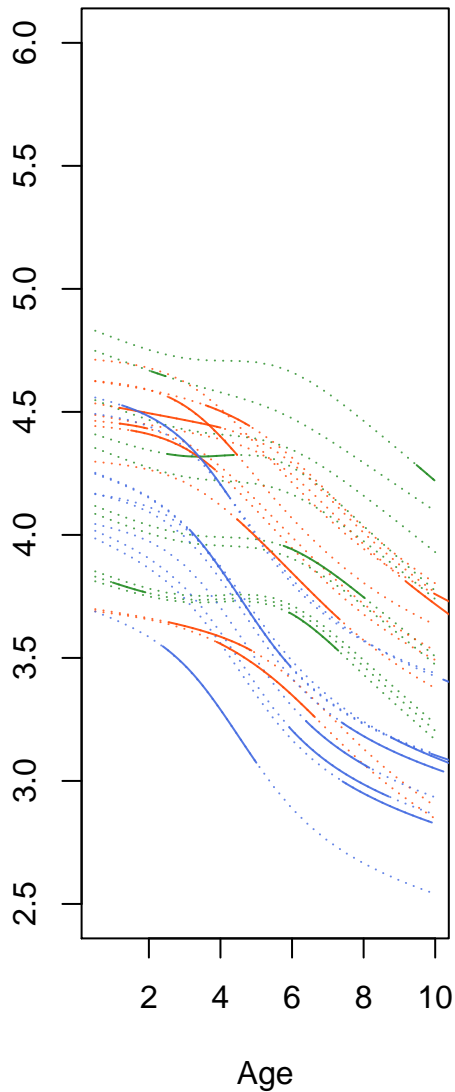

Parasite Density

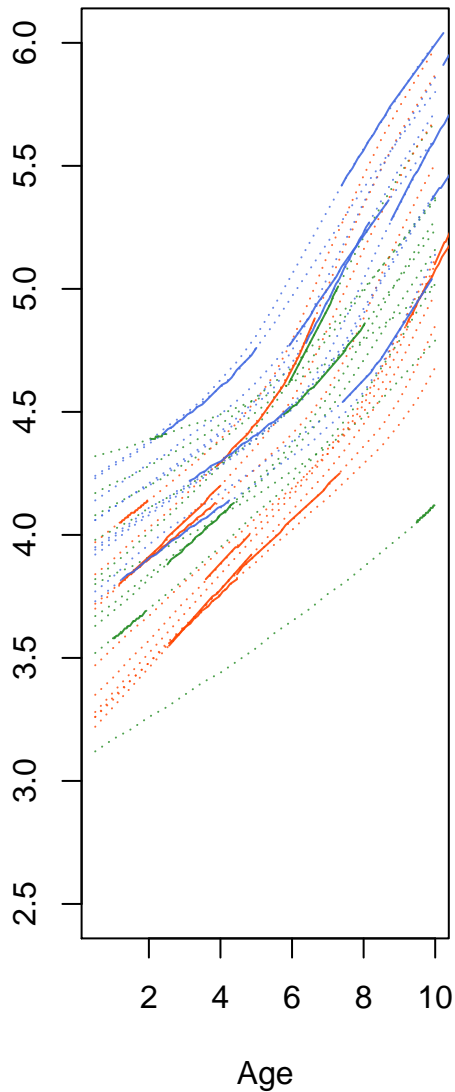

Supplement: supp [file elife_poa_e35832_Figure_5_figure_supplement_12.pdf › elife_poa_e35832_Figure_5_figure_supplement_12.pdf]

cumulative EIR

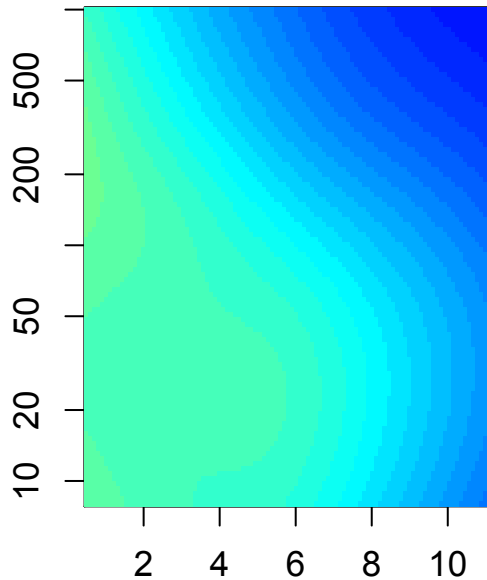

Age (years)

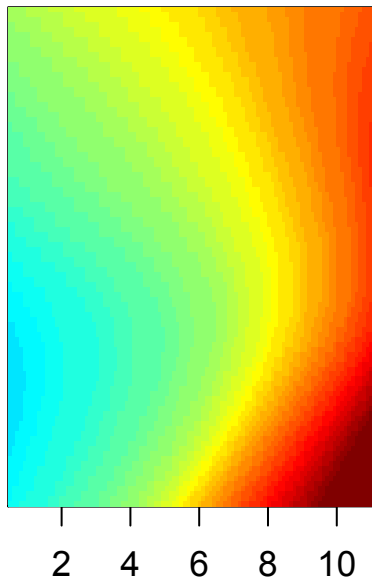

Age (years)

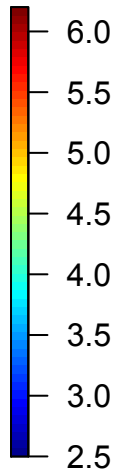

Supplement: supp [file elife_poa_e35832_Figure_5_figure_supplement_2.pdf › elife_poa_e35832_Figure_5_figure_supplement_2.pdf]

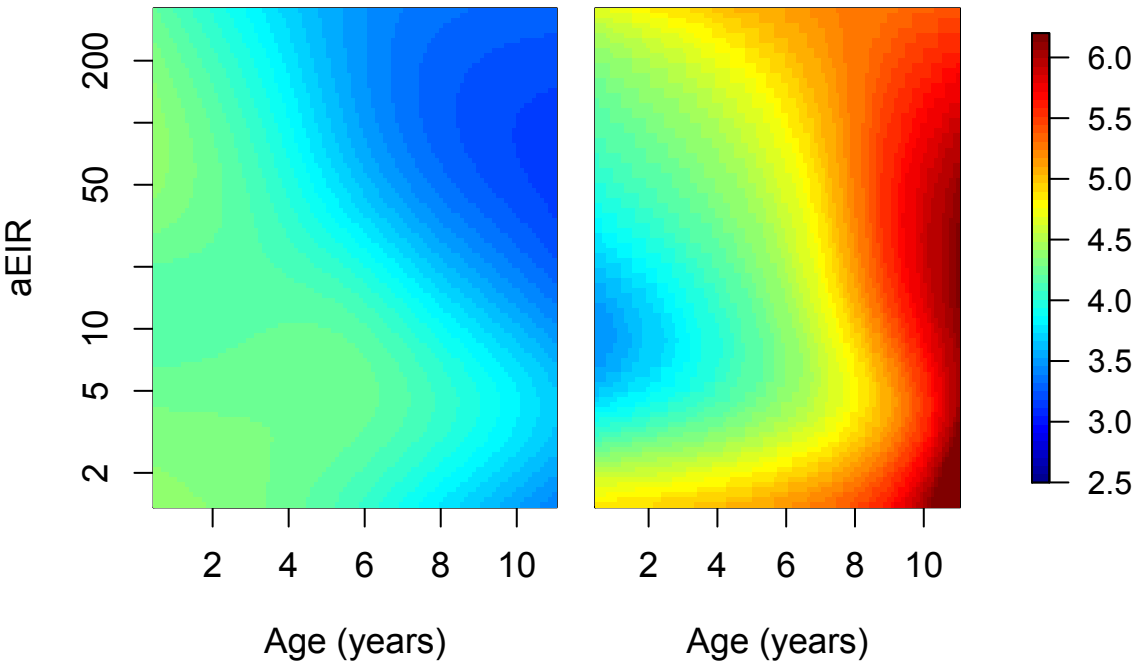

Supplement: supp [file elife_poa_e35832_Figure_5_figure_supplement_3.pdf › elife_poa_e35832_Figure_5_figure_supplement_3.pdf]

Monthly prob. non-malaria fever (Logit)

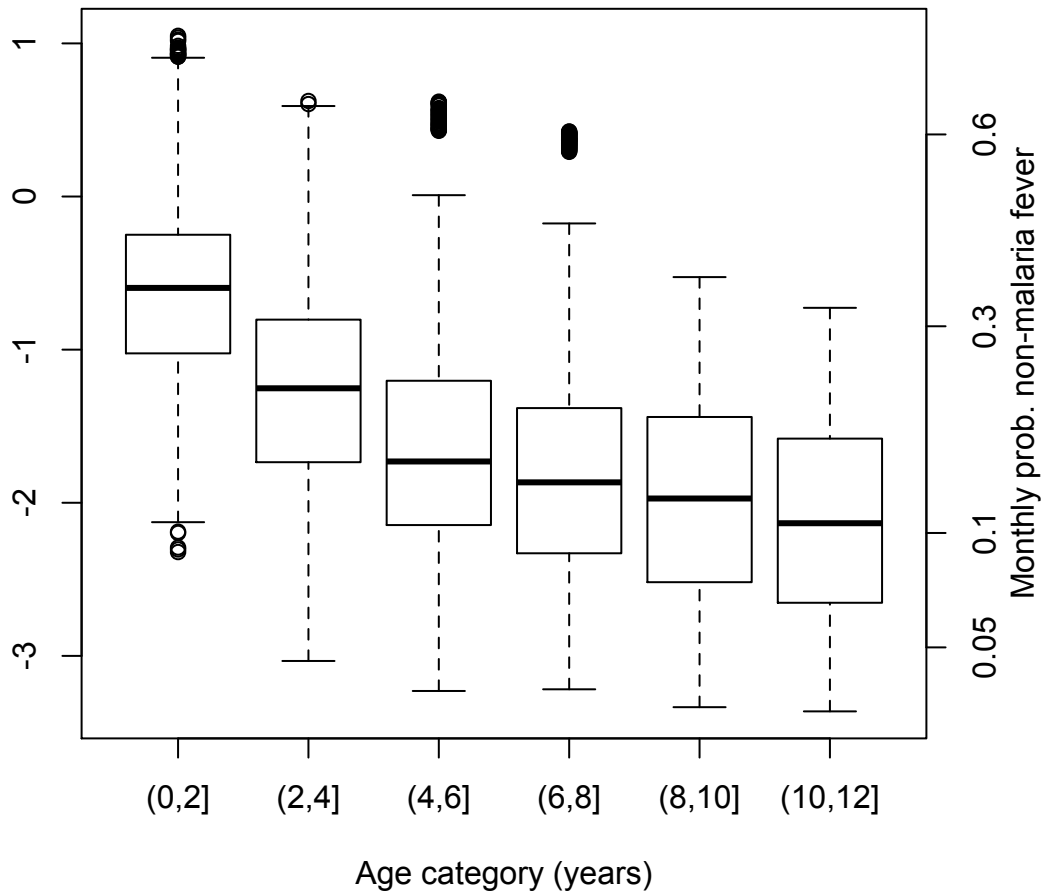

Supplement: supp [file elife_poa_e35832_Figure_5_figure_supplement_4.pdf › elife_poa_e35832_Figure_5_figure_supplement_4.pdf]

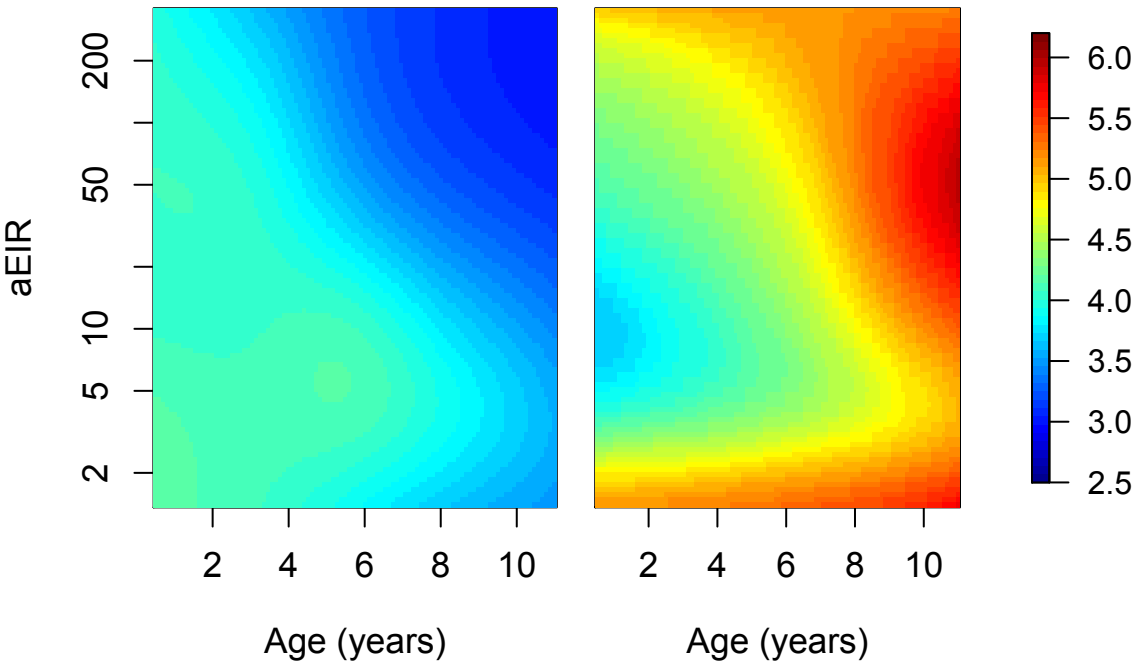

Supplement: supp [file elife_poa_e35832_Figure_5_figure_supplement_5.pdf › elife_poa_e35832_Figure_5_figure_supplement_5.pdf]

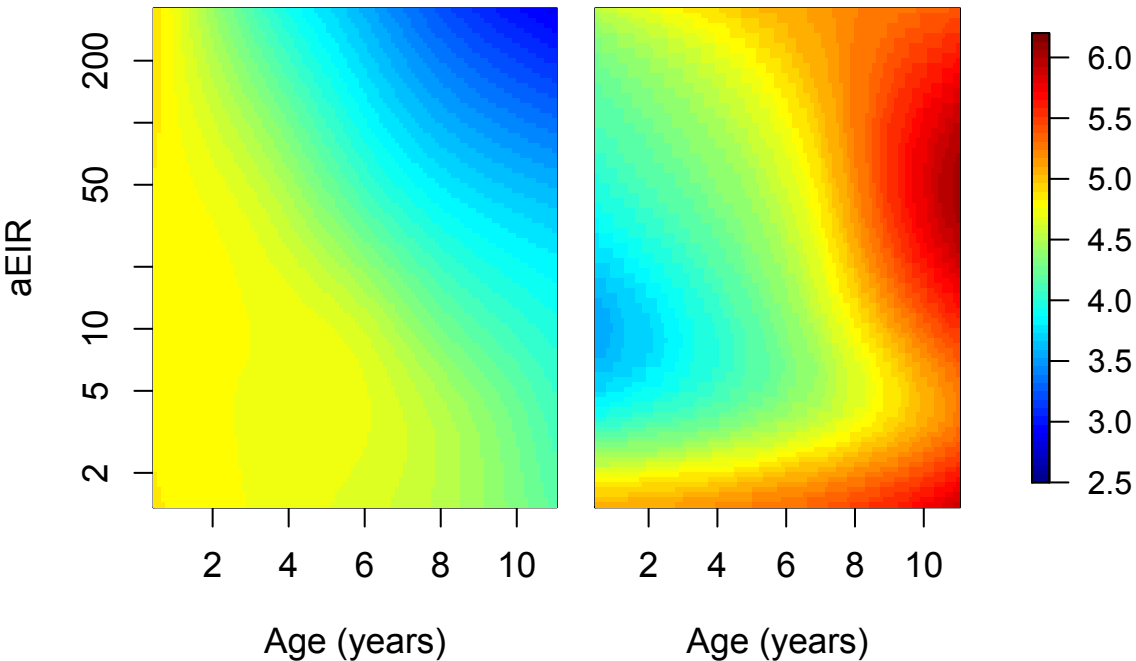

Supplement: supp [file elife_poa_e35832_Figure_5_figure_supplement_6.pdf › elife_poa_e35832_Figure_5_figure_supplement_6.pdf]

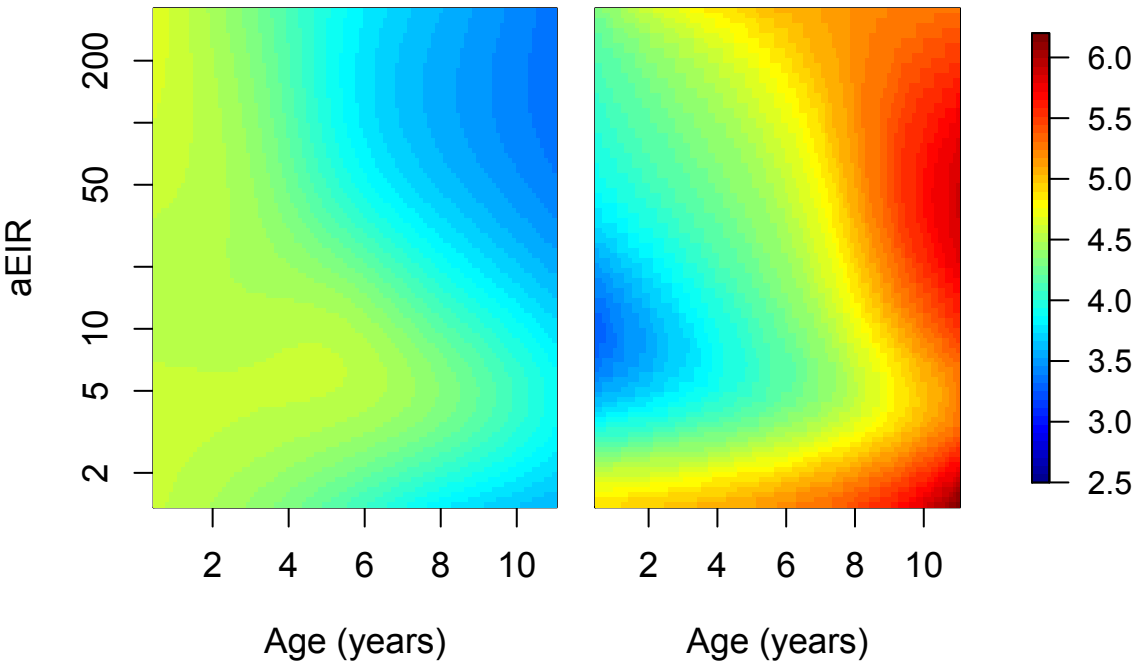

Supplement: supp [file elife_poa_e35832_Figure_5_figure_supplement_7.pdf › elife_poa_e35832_Figure_5_figure_supplement_7.pdf]

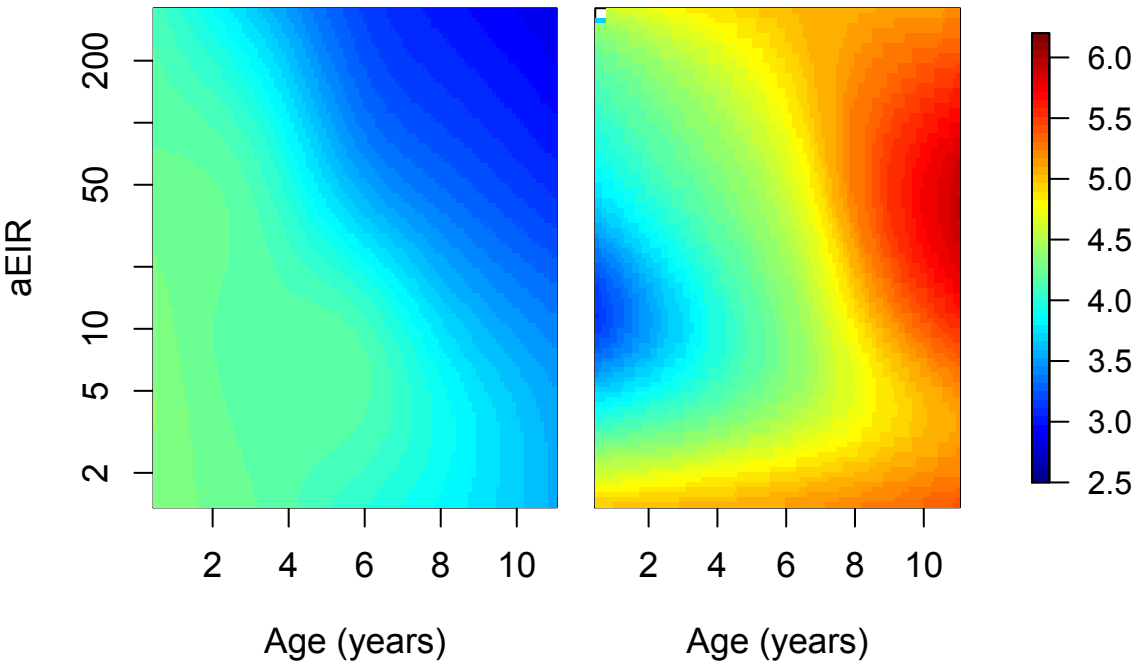

Supplement: supp [file elife_poa_e35832_Figure_5_figure_supplement_8.pdf › elife_poa_e35832_Figure_5_figure_supplement_8.pdf]

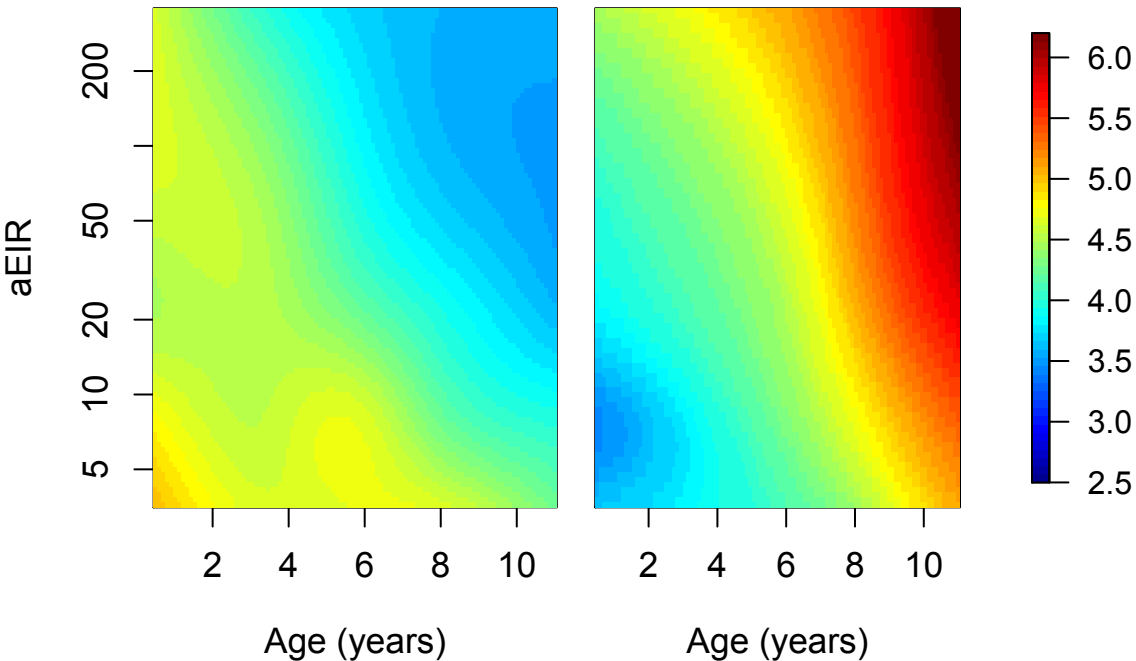

Supplement: supp [file elife_poa_e35832_Figure_5_figure_supplement_9.pdf › elife_poa_e35832_Figure_5_figure_supplement_9.pdf]

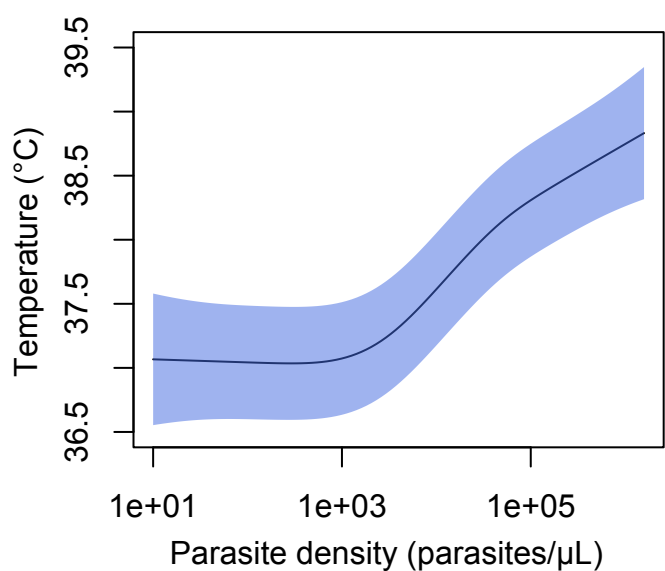

Supplement: supp [file elife_poa_e35832_Figure_6_figure_supplement_1.pdf › elife_poa_e35832_Figure_6_figure_supplement_1.pdf]

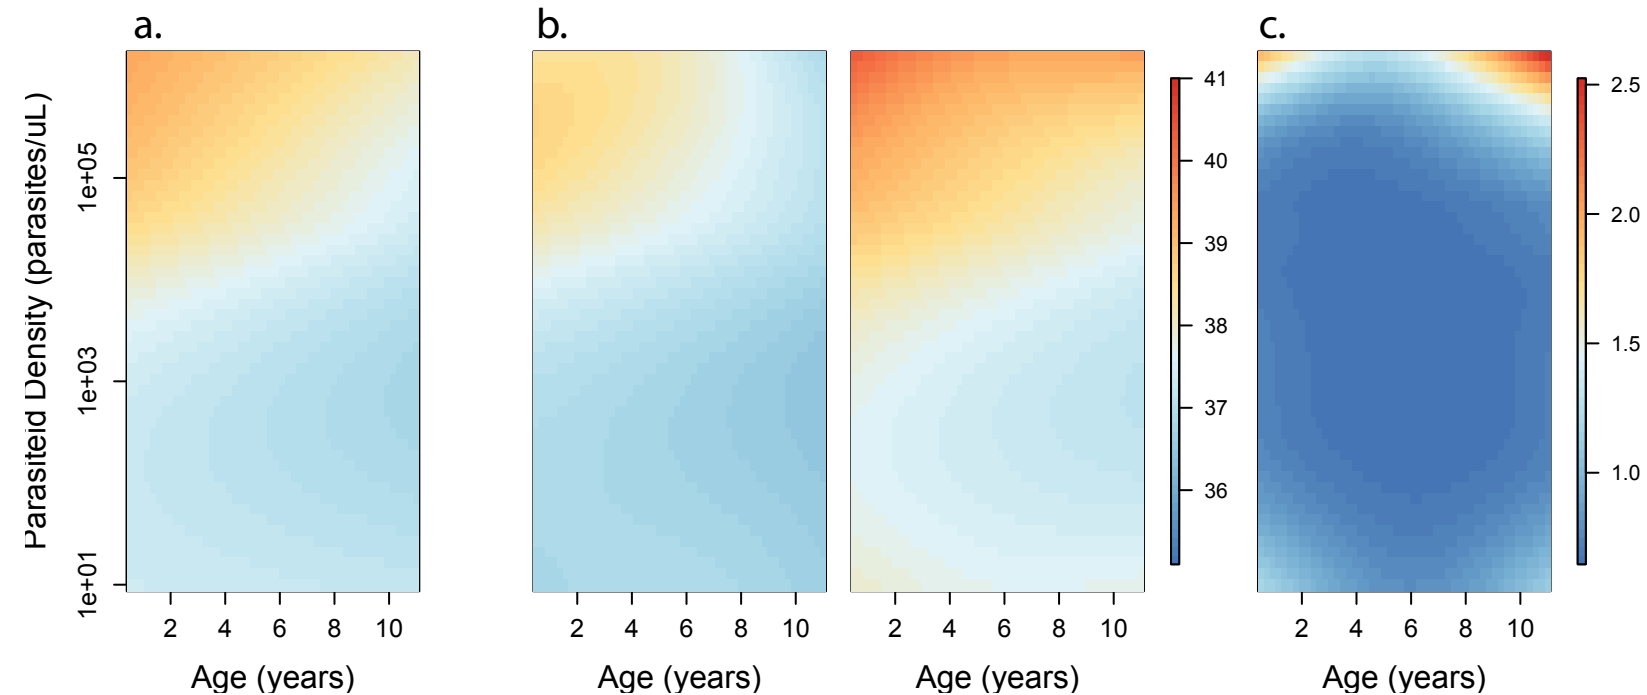

Supplement: supp [file elife_poa_e35832_Figure_6_figure_supplement_2.pdf › elife_poa_e35832_Figure_6_figure_supplement_2.pdf]

aEIR

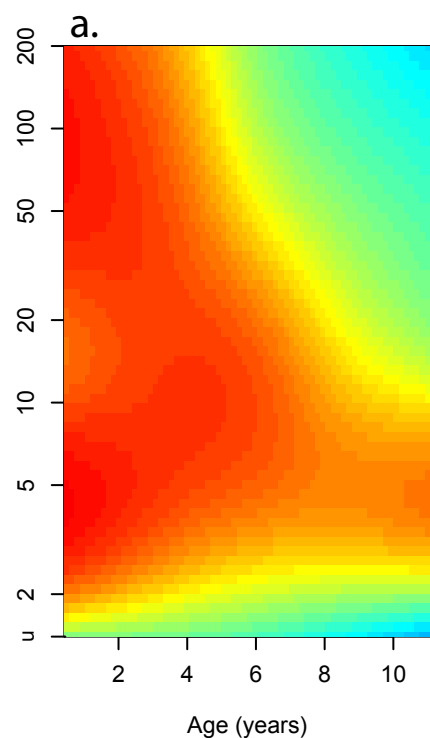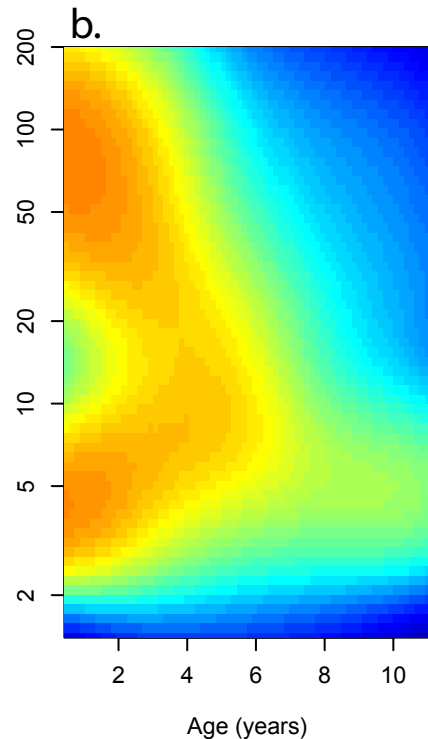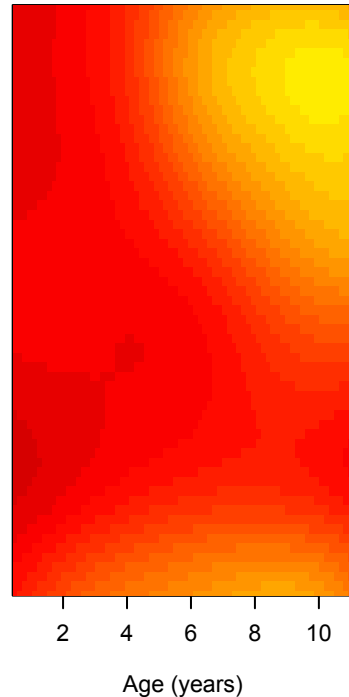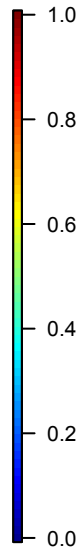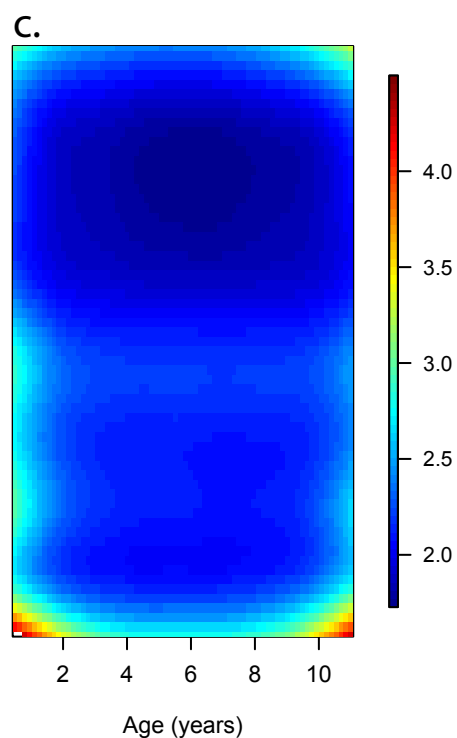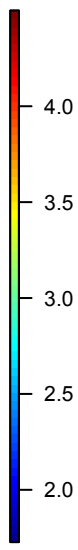

Supplement: supp [file elife_poa_e35832_Figure_7_figure_supplement_1.pdf › elife_poa_e35832_Figure_7_figure_supplement_1.pdf]
